# Supplementary material
Source: ML conference proceedings conference paper supplement (https://openreview.net/forum?id=LRdE67ATPN)
Supplement: supplementary_material [file attachment]

# Supplementary Materials: F-3DGS: Factorized Coordinates and Representations for 3D Gaussian Splatting

Anonymous Authors

## 1 FACTORIZED-3D GAUSSIAN SPLATTING REPRESENTATION DETAILS

Our main paper presents a method for factorizing all features in 3DGS. We analyze the various components of our model, which comprise feature size  $d$ , scale, rotation, and factorized coordinates components. To analyze more deeply, in Tab. 1, we conduct an ablation study based on CP and VM decomposition, varying the length of feature components. Both Factorize-CP and Factorize-VM achieve consistently better rendering quality with more feature dimensions.

## 2 MORE EXPERIMENTAL RESULTS

In this section, we provide the experimental results that are not included in the main text, the performance of our proposed method on the Tanks&Temples and the Forward-Facing datasets. Our F-3DGS method, which is based on 3D Gaussian splatting, achieves great performance on the Tanks&Temples dataset while maintaining compact model sizes. We achieve the visual quality of PSNR(30.29) with 10.94 megabytes of storage. Furthermore, our method is still real-time rendering with competitive quality, more than 60 fps. However, TensoRF and Strivec fall short of achieving real-time rendering on the Tanks&Temples dataset. The results are shown in Tab. 2. Our method achieves better PSNR and LPIPS than TensoRF and Strivec in all scenes. We also evaluate our method on the Forward-Facing dataset. The results are shown in Tab. 6. We show the per-scene detailed quantitative results of the comparisons on the synthetic-NeRF dataset in Tab. 4. With the more compact model representations, our method outperforms TensoRF and achieves better PSNR and SSIM in most of the scenes. Ours-Fac-coord denotes the model, which we only factorize the coordinates of Gaussians (while using the original per-point attributes) to evaluate the model performance. And in Tab. 3, we show the rendering FPS and model size to demonstrate our real-time rendering on the synthetic-NeRF dataset.

**Table 1: We compare our model on CP and VM methods. We use different sizes of voxel, which do not influence the performance.**

|       | voxel | Model Size (avg) ↓ | PSNR ↑ |
|-------|-------|--------------------|--------|
| CP-16 | 5×5×5 | 6.06MB             | 32.42  |
| CP-24 | 5×5×5 | 8.10MB             | 32.56  |
| CP-48 | 6×6×6 | 13.97MB            | 32.88  |
| CP-96 | 6×6×6 | 25.83MB            | 33.13  |
| VM-8  | 5×5×5 | 16.20MB            | 32.80  |
| VM-16 | 6×6×6 | 28.75MB            | 33.21  |
| VM-48 | 6×6×6 | 81.46MB            | 33.33  |

**Table 2: We show the average rendering FPS (Frames per second), the average model size, and PSNR on the Tanks&Temples dataset.**

|            | FPS ↑ | Model size ↓ | PSNR ↑ |
|------------|-------|--------------|--------|
| TensoRF-CP | <20   | 3.9MB        | 27.59  |
| TensoRF-VM | <20   | 71.8MB       | 28.56  |
| Strivec-48 | <20   | 54.08MB      | 28.70  |
| 3DGS       | 170.8 | 105.15MB     | 30.88  |
| Ours-CP-16 | 138.8 | 10.94MB      | 30.29  |

**Table 3: We show the average rendering FPS (Frames per second), the average model size, and PSNR on the synthetic-NeRF dataset.**

|            | FPS ↑ | Model size ↓ | PSNR ↑ |
|------------|-------|--------------|--------|
| TensoRF-CP | <30   | 3.9MB        | 31.56  |
| TensoRF-VM | <30   | 71.8MB       | 33.14  |
| Strivec-48 | <30   | 54.08MB      | 33.55  |
| 3DGS       | 345.8 | 68.88MB      | 33.31  |
| Ours-CP-16 | 237.4 | 6.06MB       | 32.42  |

## 3 MIP-NeRF360 DATASET

We also demonstrate our method performance on Mip-NeRF360 dataset. The qualitative and quantitative results are shown in Fig. 3 and Tab. 7. TensoRF did not provide the results on 360 scenes, and Strivec only have results on the room scene. Please note that this is our very early attempt at the 360 scene dataset, and we believe further training and algorithmic techniques can improve the performance of 360 scenes. This will be a very promising research subject for subsequent studies.

## 4 QUALITATIVE RESULTS

Also, We provided a few qualitative results on Mip-NeRF360 and Tanks&Temple datasets (Fig. 3, Fig. 1 and Fig. 2).

Table 4: Per-scene results evaluated on synthetic-NeRF dataset.

|                | Chair | Drums        | Lego  | Mic          | Materials    | Ship         | Hotdog       | Ficus        | Average | Model size (avg) |
|----------------|-------|--------------|-------|--------------|--------------|--------------|--------------|--------------|---------|------------------|
| PSNR ↑         |       |              |       |              |              |              |              |              |         |                  |
| NeRF           | 33.00 | 25.01        | 32.54 | 32.91        | 29.62        | 28.65        | 36.18        | 30.13        | 31.01   | -                |
| InstantNGP     | 35.42 | 24.24        | 34.82 | 35.98        | 28.99        | 30.72        | 37.45        | 32.09        | 32.46   | -                |
| TensoRF-CP-384 | 33.60 | 25.17        | 34.05 | 33.77        | 30.10        | 28.84        | 36.24        | 30.72        | 31.56   | 3.90MB           |
| TensoRF-VM-192 | 35.76 | 26.01        | 36.46 | 34.61        | 30.12        | 30.77        | 37.41        | 33.99        | 33.14   | 71.80MB          |
| 3D GS          | 35.83 | 26.15        | 35.78 | 35.36        | 30.00        | 30.80        | 37.72        | 34.87        | 33.52   | 68.88MB          |
| Ours-CP-16     | 34.39 | 25.76        | 34.39 | 34.25        | 29.42        | 30.79        | 36.52        | 34.30        | 32.48   | 6.06MB           |
| Ours-VM-16     | 34.87 | 26.20        | 35.54 | 34.98        | 30.42        | 31.38        | 37.31        | <b>35.22</b> | 33.24   | 28.75MB          |
| Ours-VM-48     | 35.31 | <b>26.30</b> | 35.93 | <b>35.14</b> | <b>30.67</b> | <b>31.59</b> | <b>37.79</b> | 35.19        | 33.49   | 61.46MB          |
| Ours-Fac-coord | 35.08 | 26.23        | 36.03 | 35.97        | 30.33        | 31.59        | 37.79        | 35.11        | 33.52   | -                |
| SSIM ↑         |       |              |       |              |              |              |              |              |         |                  |
| NeRF           | 0.967 | 0.925        | 0.961 | 0.980        | 0.949        | 0.856        | 0.974        | 0.964        | 0.947   |                  |
| InstantNGP     | 0.985 | 0.924        | 0.979 | 0.990        | 0.945        | 0.892        | 0.982        | 0.977        | 0.959   |                  |
| TensoRF-CP-384 | 0.973 | 0.921        | 0.971 | 0.983        | 0.950        | 0.857        | 0.975        | 0.965        | 0.949   |                  |
| TensoRF-VM-192 | 0.985 | 0.937        | 0.983 | 0.988        | 0.952        | 0.895        | 0.982        | 0.982        | 0.963   |                  |
| Ours-CP-16     | 0.980 | 0.949        | 0.977 | 0.987        | 0.953        | 0.898        | 0.981        | 0.983        | 0.964   |                  |
| Ours-VM-16     | 0.984 | <b>0.952</b> | 0.981 | <b>0.990</b> | <b>0.959</b> | <b>0.903</b> | <b>0.984</b> | <b>0.985</b> | 0.967   |                  |
| LPIPS ↓        |       |              |       |              |              |              |              |              |         |                  |
| NeRF           | 0.046 | 0.091        | 0.050 | 0.028        | 0.063        | 0.206        | 0.121        | 0.044        | 0.081   |                  |
| InstantNGP     | 0.022 | 0.092        | 0.025 | 0.017        | 0.069        | 0.137        | 0.037        | 0.026        | 0.053   |                  |
| TensoRF-CP-384 | 0.044 | 0.114        | 0.038 | 0.035        | 0.068        | 0.196        | 0.052        | 0.058        | 0.076   |                  |
| TensoRF-VM-192 | 0.022 | 0.073        | 0.018 | 0.015        | 0.058        | 0.138        | 0.032        | 0.022        | 0.047   |                  |
| Ours-CP-16     | 0.019 | 0.047        | 0.023 | 0.012        | 0.052        | 0.122        | 0.029        | 0.018        | 0.040   |                  |
| Ours-VM-16     | 0.014 | 0.041        | 0.018 | 0.009        | 0.043        | 0.111        | 0.024        | 0.015        | 0.034   |                  |

Table 5: Per-scene results evaluated on Tanks&Temples dataset.

|            | Ignatius | Truck | Barn  | Caterpillar | Family | Average | Model size (avg) |
|------------|----------|-------|-------|-------------|--------|---------|------------------|
| PSNR ↑     |          |       |       |             |        |         |                  |
| NeRF       | 25.43    | 25.36 | 24.05 | 23.75       | 30.29  | 25.78   | -                |
| NSVF       | 27.91    | 26.92 | 27.16 | 26.44       | 33.58  | 28.40   | -                |
| TensoRF-CP | 27.86    | 26.25 | 26.74 | 24.73       | 32.39  | 27.59   | 3.9MB            |
| TensoRF-VM | 28.34    | 27.14 | 27.22 | 26.19       | 33.92  | 28.56   | 71.8MB           |
| Strivec-48 | 28.39    | 27.32 | 28.09 | 26.58       | 33.13  | 28.70   | 54.08MB          |
| 3D GS      | 28.96    | 29.89 | 30.31 | 28.76       | 36.48  | 30.88   | 105.15MB         |
| Ours-CP-16 | 28.65    | 29.65 | 29.44 | 27.93       | 35.77  | 30.29   | 10.94MB          |
| SSIM ↑     |          |       |       |             |        |         |                  |
| NeRF       | 0.920    | 0.860 | 0.750 | 0.860       | 0.932  | 0.864   |                  |
| NSVF       | 0.930    | 0.895 | 0.823 | 0.900       | 0.954  | 0.900   |                  |
| TensoRF-CP | 0.934    | 0.885 | 0.839 | 0.879       | 0.948  | 0.897   |                  |
| TensoRF-VM | 0.948    | 0.914 | 0.864 | 0.912       | 0.965  | 0.920   |                  |
| Strivec-48 | 0.948    | 0.915 | 0.884 | 0.917       | 0.957  | 0.924   |                  |
| Ours-CP-16 | 0.955    | 0.958 | 0.935 | 0.951       | 0.985  | 0.957   |                  |
| LPIPS ↓    |          |       |       |             |        |         |                  |
| NeRF       | 0.111    | 0.192 | 0.395 | 0.196       | 0.098  | 0.198   |                  |
| NSVF       | 0.106    | 0.148 | 0.307 | 0.141       | 0.063  | 0.153   |                  |
| TensoRF-CP | 0.089    | 0.154 | 0.237 | 0.176       | 0.063  | 0.144   |                  |
| TensoRF-VM | 0.081    | 0.129 | 0.217 | 0.139       | 0.057  | 0.125   |                  |
| Strivec-48 | 0.083    | 0.123 | 0.167 | 0.125       | 0.065  | 0.113   |                  |
| Ours-CP-16 | 0.052    | 0.055 | 0.112 | 0.063       | 0.023  | 0.061   |                  |

Table 6: Per-scene results evaluated on Forward-Facing dataset.

|            | Room  | Fern  | Leaves | Fortress | Orchids | Flower | T-Rex | Horns | Average | Model size (avg) |
|------------|-------|-------|--------|----------|---------|--------|-------|-------|---------|------------------|
| PSNR ↑     |       |       |        |          |         |        |       |       |         |                  |
| NeRF       | 32.70 | 25.17 | 20.92  | 31.16    | 20.36   | 27.40  | 26.80 | 27.45 | 26.50   | -                |
| Plenoxel   | 30.22 | 25.46 | 21.41  | 31.09    | 20.24   | 27.83  | 26.48 | 27.58 | 26.29   | -                |
| TensoRF-VM | 31.80 | 25.31 | 21.34  | 31.14    | 20.02   | 28.22  | 26.61 | 27.64 | 26.51   | 18.90MB          |
| 3DGS       | 31.95 | 25.92 | 21.22  | 32.34    | 20.71   | 28.76  | 26.87 | 27.25 | 26.88   | 79.36MB          |
| Ours-CP-16 | 31.40 | 25.54 | 20.07  | 31.49    | 20.17   | 28.26  | 26.43 | 26.84 | 26.28   | 10.88MB          |

Table 7: Our method performance on 360 indoor scenes.

|         | room  | kitchen | counter | bonsai | Model size (avg) |
|---------|-------|---------|---------|--------|------------------|
| Strivec | 28.11 | -       | -       | -      | 12.6MB           |
| DVGO    | 28.35 | -       | -       | -      | 5.1GB            |
| 3DGS    | 31.7  | 30.32   | 28.70   | 31.98  | 334.75MB         |
| Ours    | 30.84 | 30.14   | 28.14   | 31.23  | 70.50MB          |

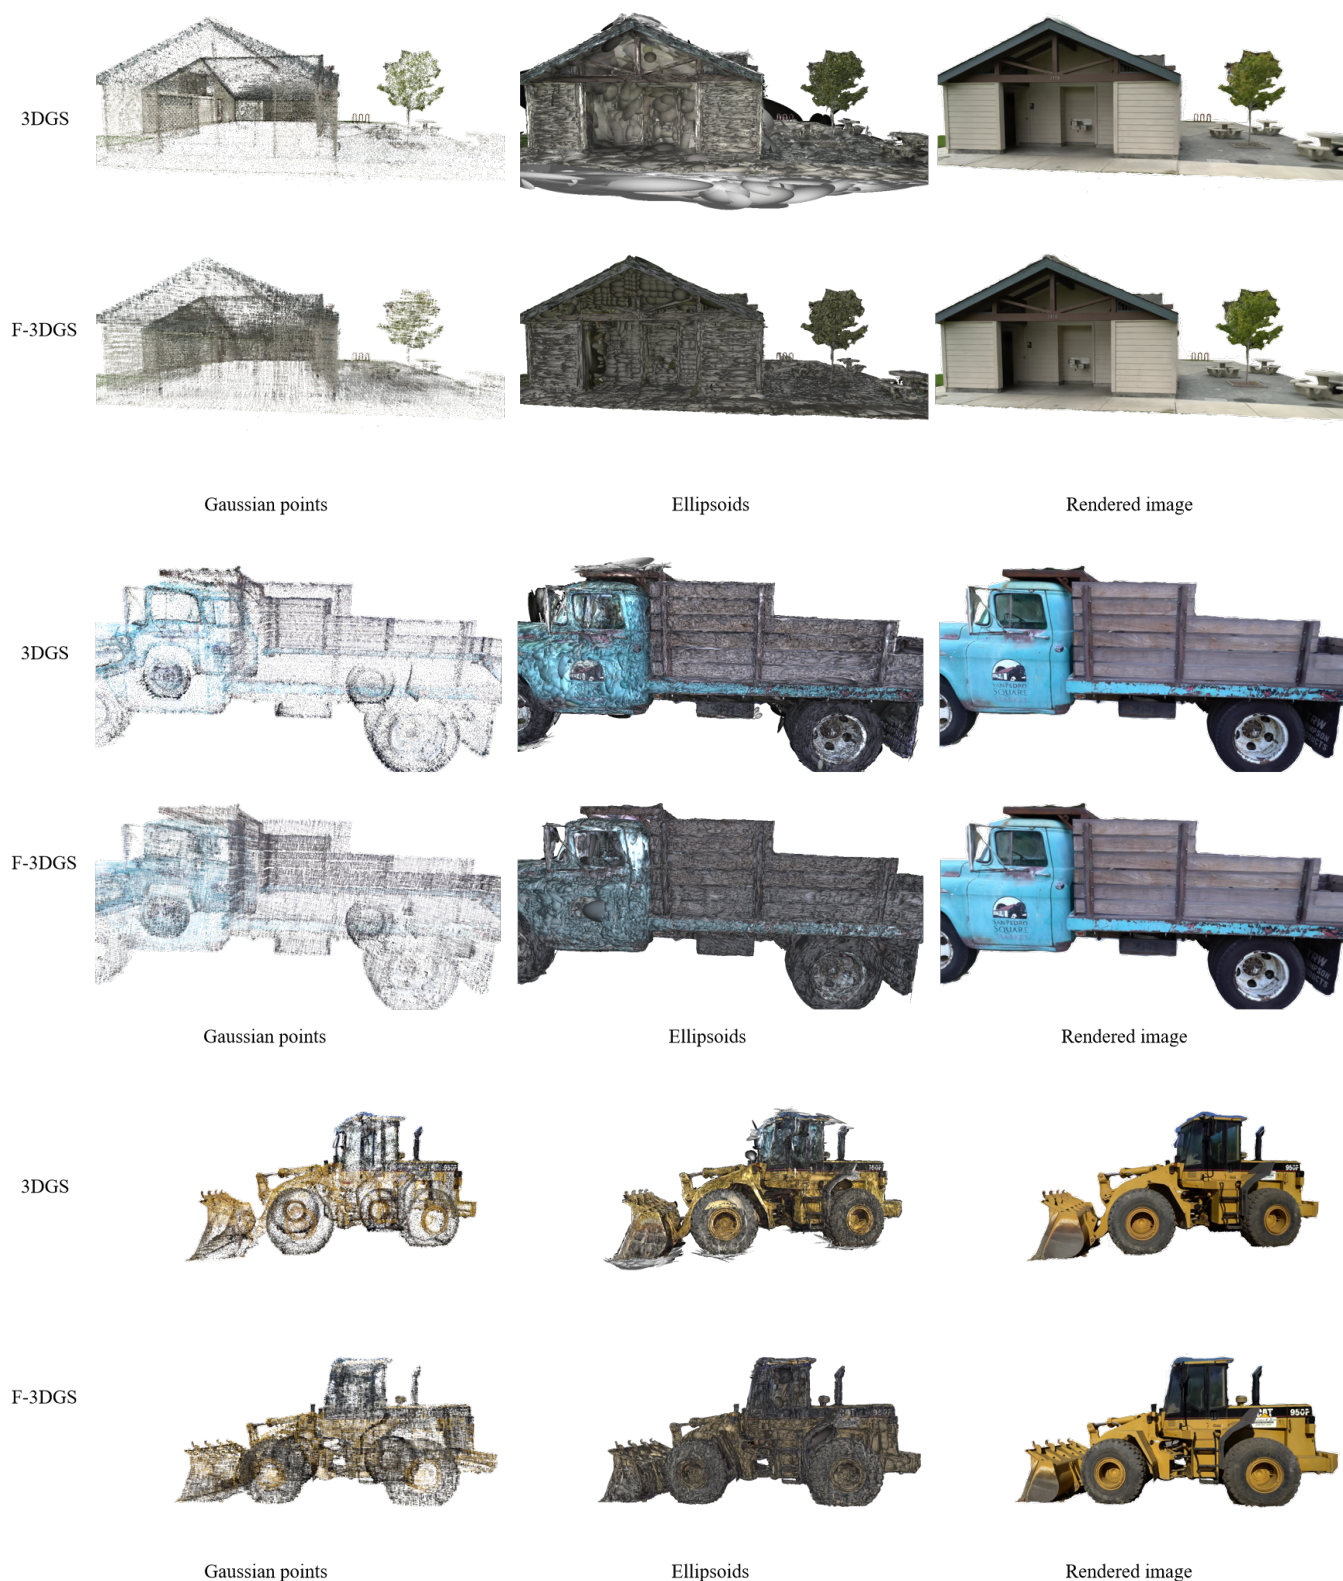

**Figure 1: Visualization of F-3DGS and 3DGS. These visualize Gaussian points, ellipsoids, and rendered images of three objects in Tanks&Temples dataset.**



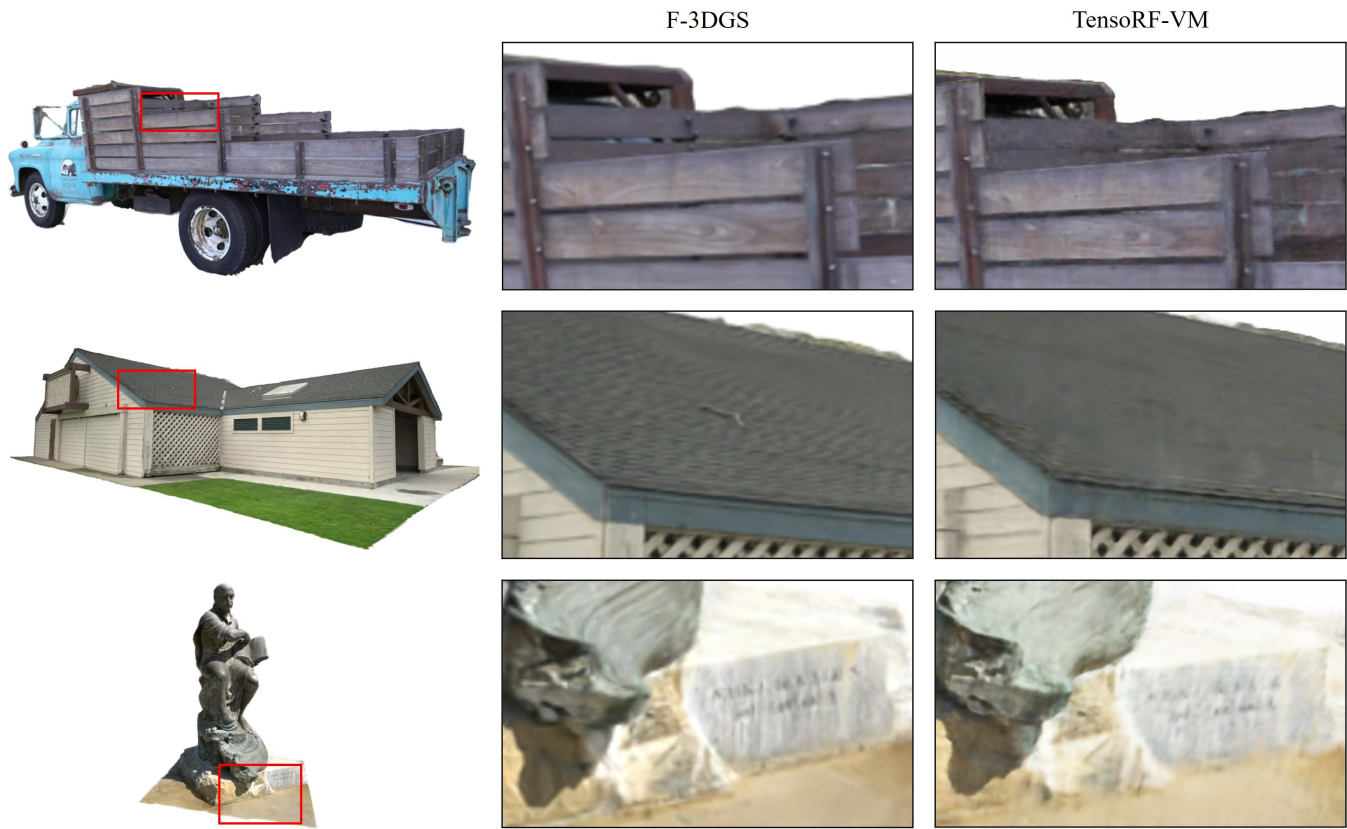

Figure 2: The qualitative results on Tanks&Temples dataset. With only  $\frac{1}{7}$  of model size, our method achieved better image quality and significantly faster rendering speed.

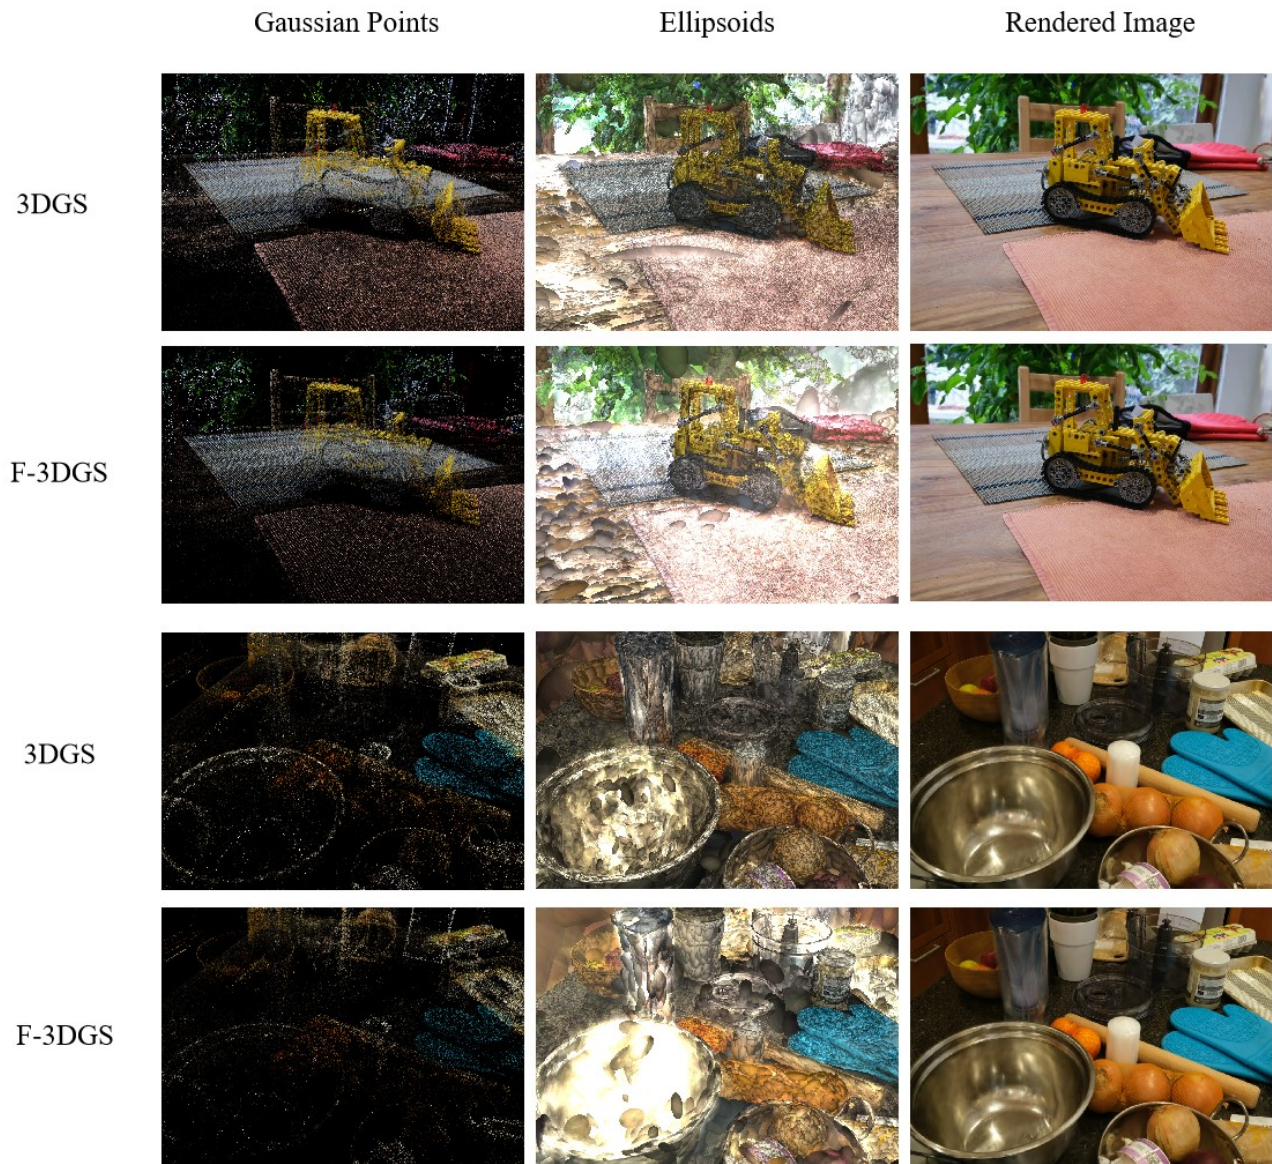

Figure 3: The qualitative results on Mip-NeRF360 dataset.
